# Supplementary material
Source: publisher figshare collection journal article supplement (https://acs.figshare.com/ndownloader/files/23027270)
Supplement: Supplementary file 1 [file 23027270]

# One-Step Eco-Friendly Superhydrophobic Coating Method Using Polydimethylsiloxane and Ammonium Bicarbonate

*Seongmin Kim, Jeong-Won Lee, and Woonbong Hwang \**

Department of Mechanical Engineering, Pohang University of Science and Technology, Pohang,  
Gyeongbuk, 37673, Republic of Korea

\* Corresponding author

*Email: whwang@postech.ac.kr*

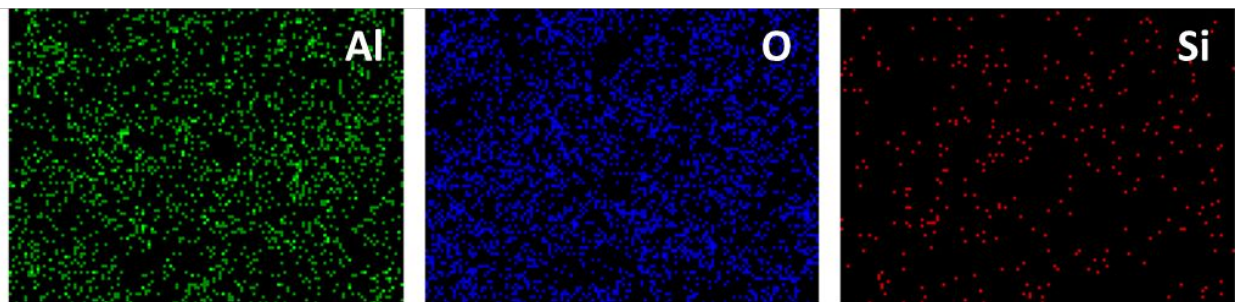

Figure S1. EDS maps of the coated Al surface.

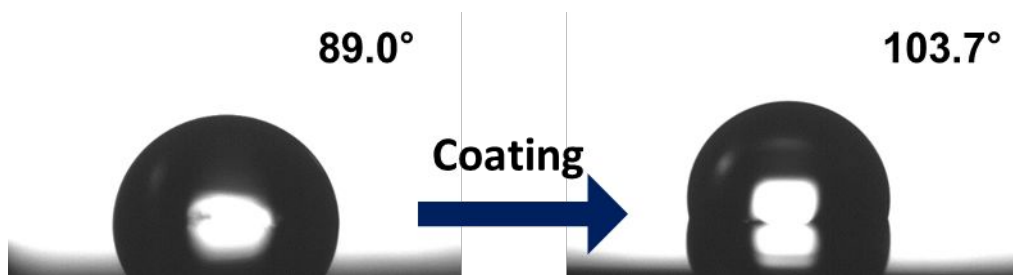

Figure S2. Images of water droplets on a flat Al surface before and after coating.

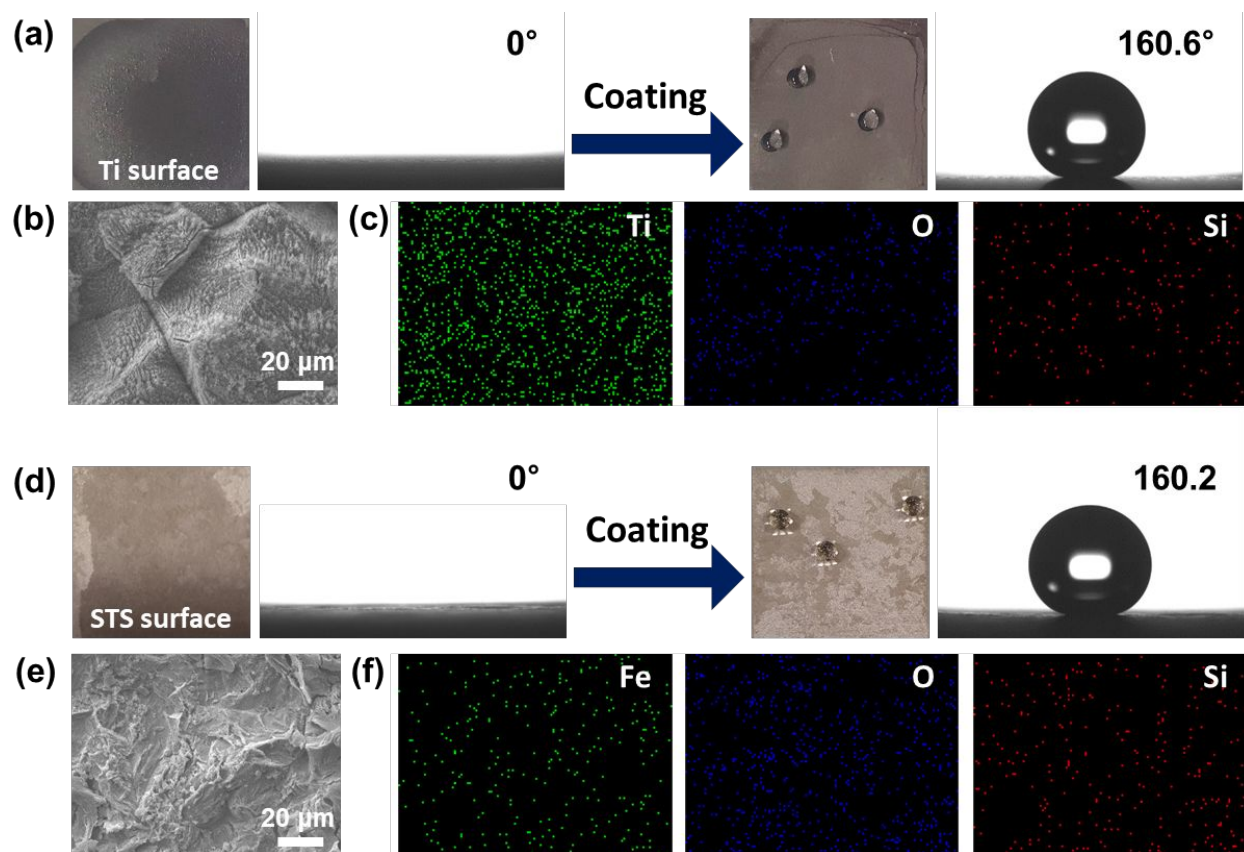

Figure S3. (a) Images of water droplets on a Ti surface before and after coating. (b) SEM image and (c) EDS maps of the coated Ti surface. (d) Images of water droplets on the STS surface before and after coating. (e) SEM image and (f) EDS maps of the coated STS surface.

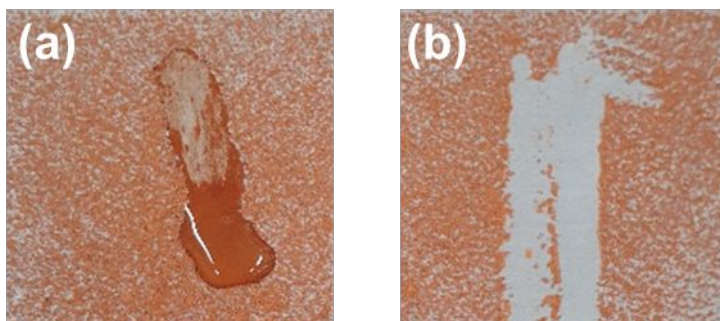

Figure S4. Self-cleaning tests. (a) Image of a non-coated surface after dropping five water droplets. (b) Image of the coated surface after dropping five water droplets.

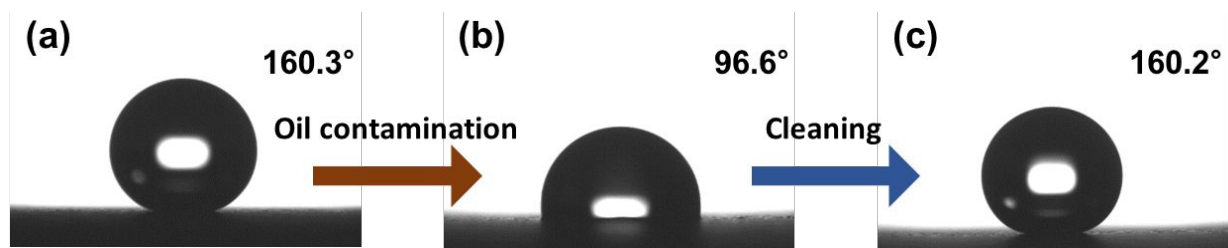

Figure S5. Images of water droplets on the coated surface (a) before being contaminated with oil (b) after oil contamination, and (c) after cleaning.
